# Supplementary material for: Cloning southern corn rust resistant gene RppK and its cognate gene AvrRppK from Puccinia polysora
Source: PubMed Central journal article supplement (PMC9338322; doi:10.1038/s41467-022-32026-4), 2022-07-29
Supplement: 41467_2022_32026_MOESM3_ESM.pdf [file 41467_2022_32026_MOESM3_ESM.pdf]

## Description of Additional Supporting Information

File name: Supplementary Data 1.

Description: The haplotype of *RppK* loci in 500 inbred lines of the association mapping panel.

File name: Supplementary Data 2.

Description: The information of 288 landrace accessions.

File name: Supplementary Data 3.

Description: The information of 166 teosinte accessions.

File name: Supplementary Data 4.

Description: The information of 74 hybrids commercially cultivated in China.

File name: Supplementary Data 5.

Description: Primers used in this study.
